# Supplementary material for: The talin–integrin interface under mechanical stress
Source: Royal Society of Chemistry journal article supplement (doi:10.1039/c4mb00341a), 2014-09-24
Supplement: c4mb00341a1.pdf [file c4mb00341a1.pdf]

Supplementary Material

**The talin-integrin interface under mechanical stress**

Sampo Kukkurainen, Juha A. Määttä, John Saeger, Jarkko Valjakka, Viola Vogel, Vesa P. Hytönen

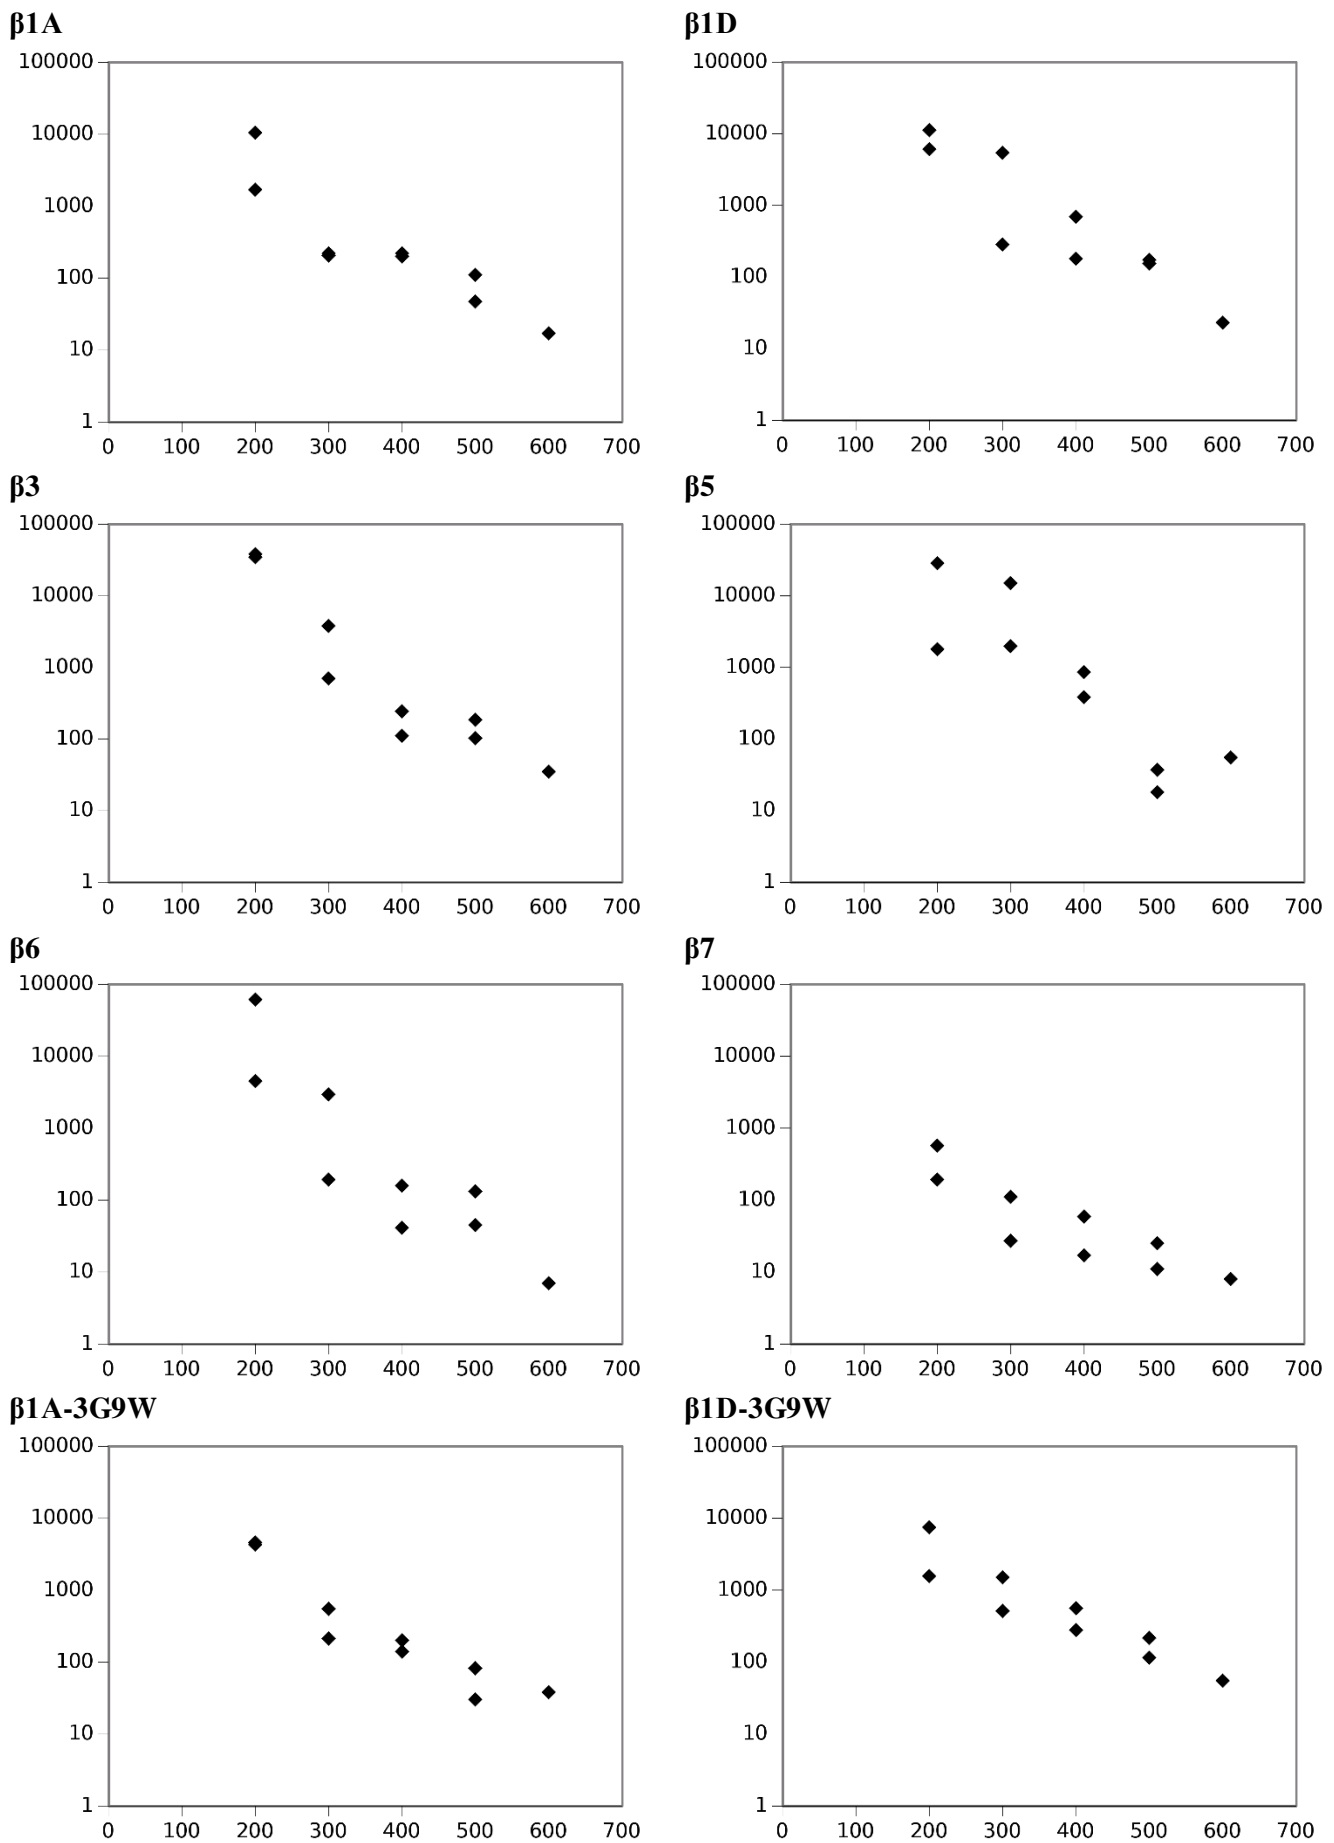

**Figure S1** W739( $\beta$ 3)-R358(tal) side chain center of mass distance. Bound state lifetime in picoseconds in the different simulations. Distance cutoff for the bound state: 5 Å. X-axis: force (pN). Y-axis: time (ps).

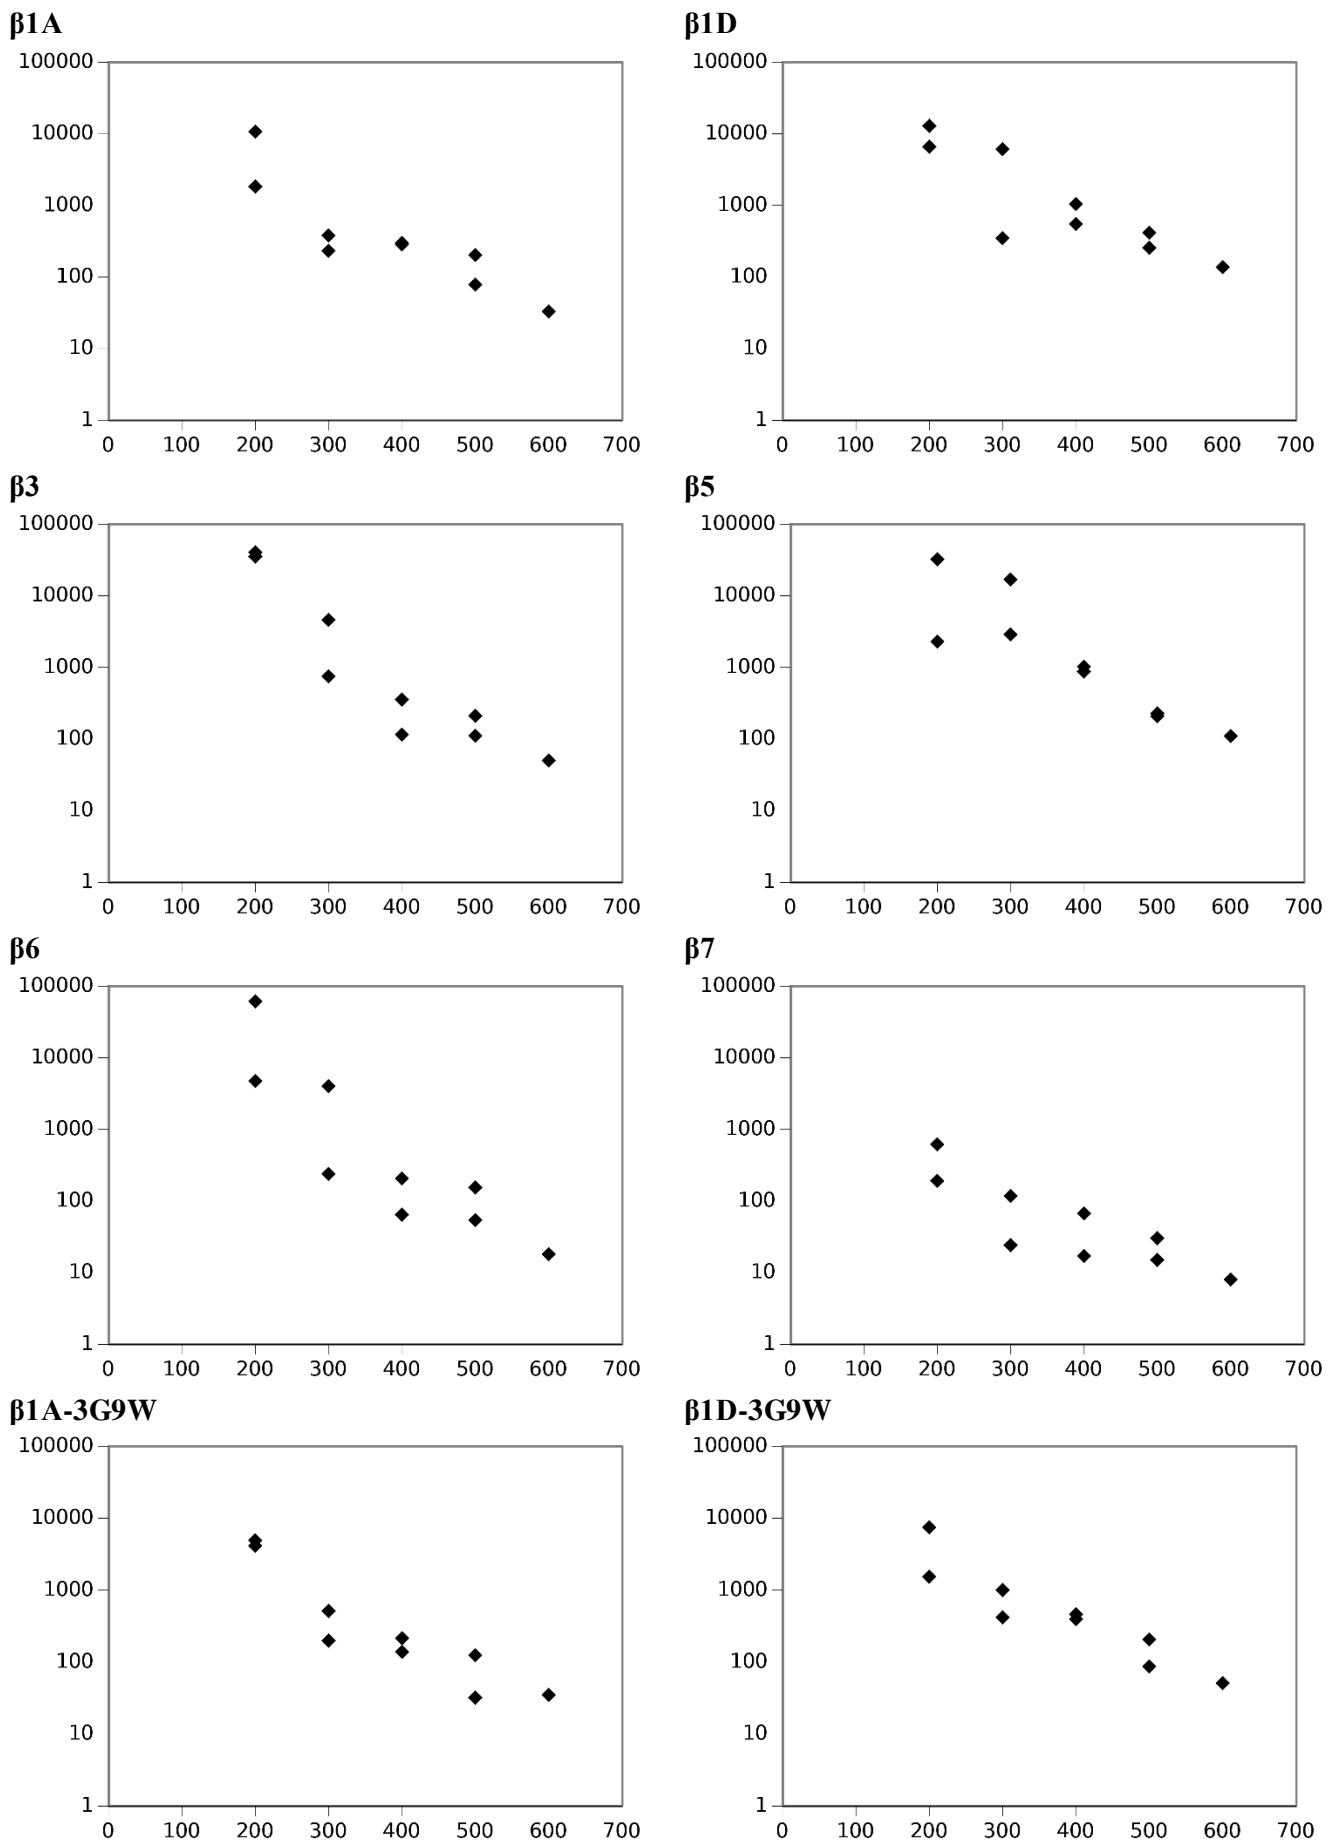

**Figure S2** D740( $\beta$ 3)-W359(tal)  $C\alpha$ - $C\alpha$  distance. Bound state lifetime in picoseconds in the different simulations. Distance cutoff for the bound state: 7 Å. X-axis: force (pN). Y-axis: time (ps).

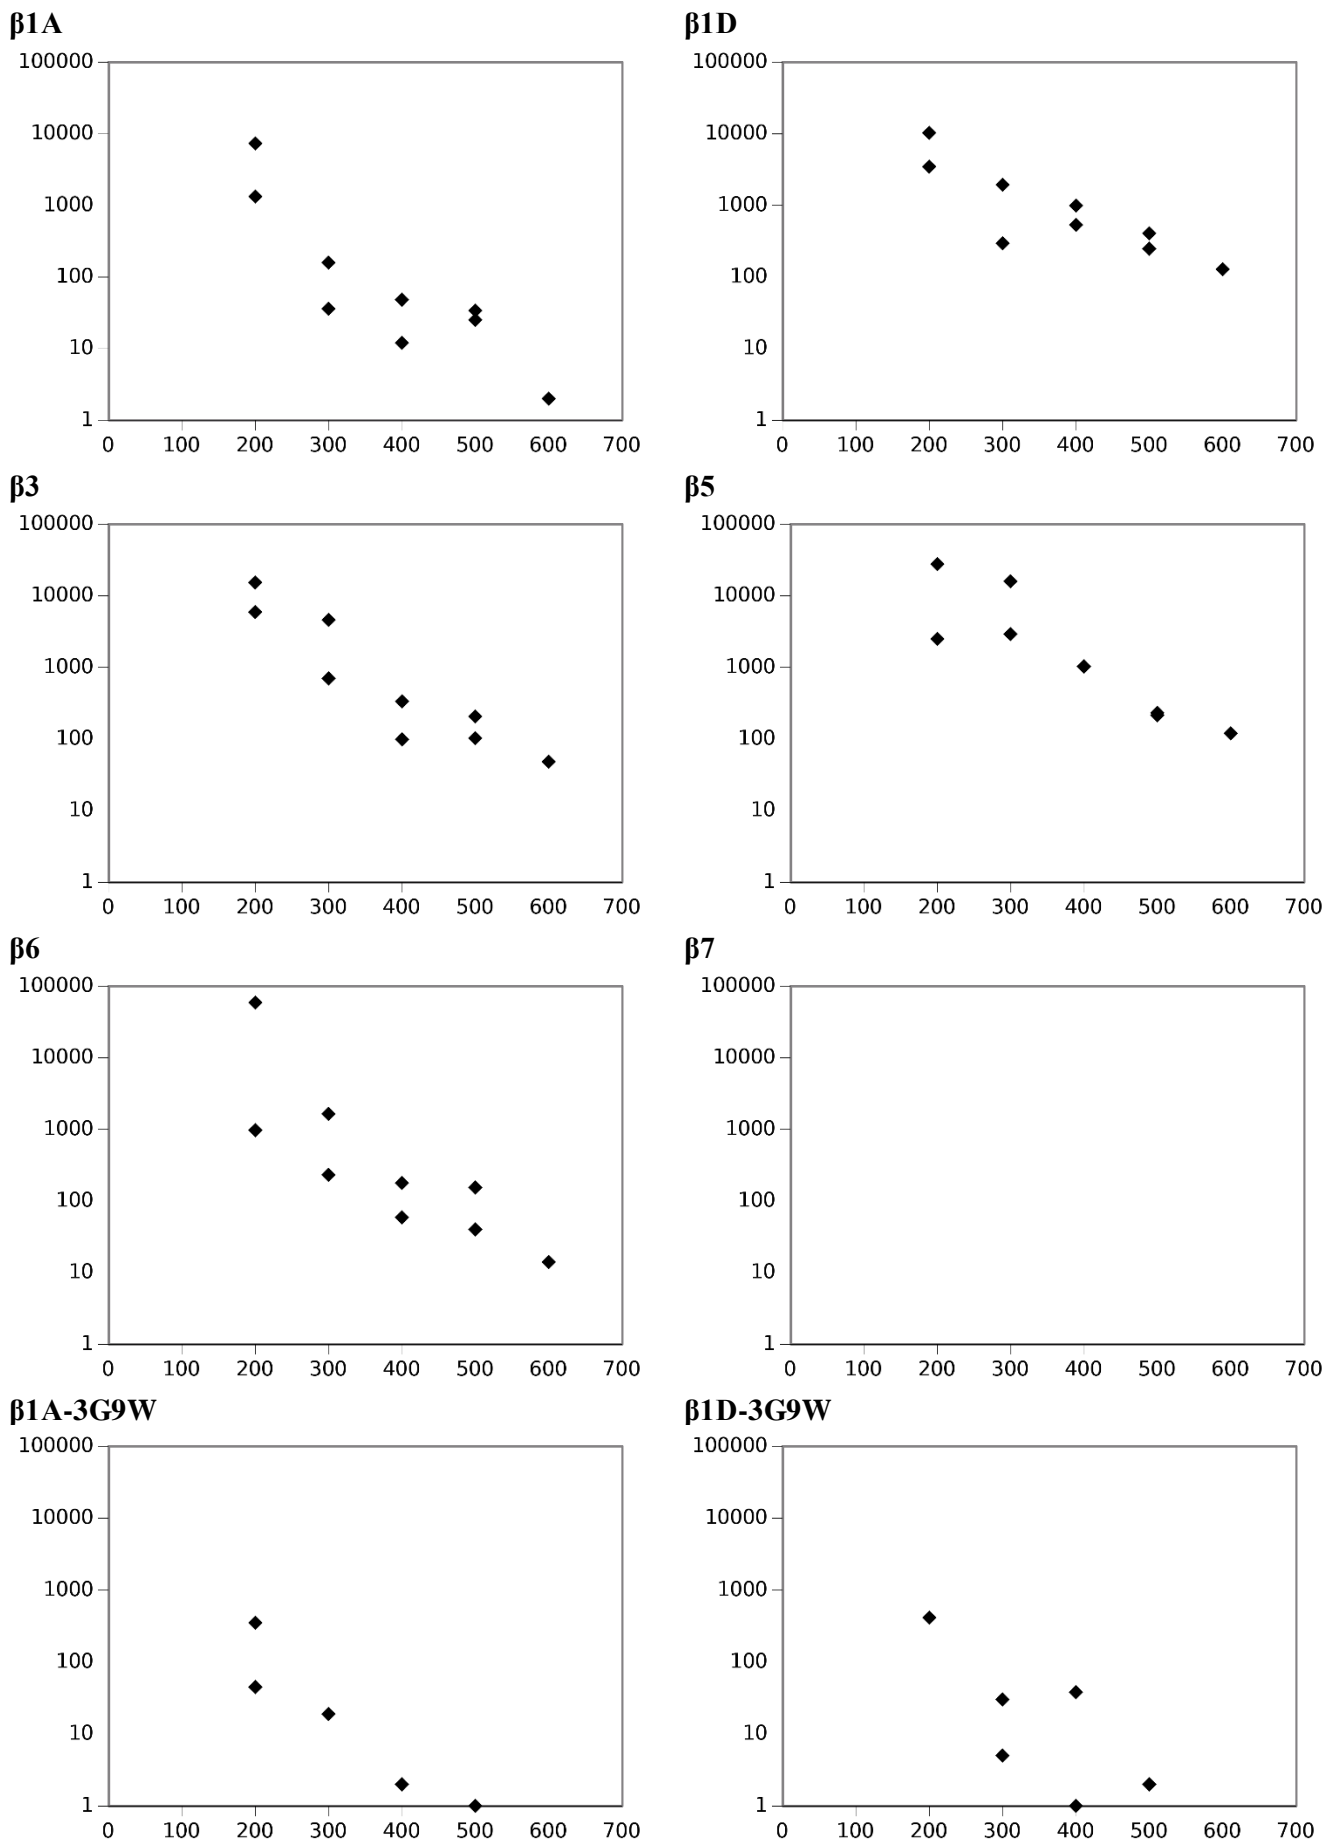

**Figure S3** A742( $\beta$ 3)-K357(tal)  $C\alpha$ - $C\alpha$  distance. Bound state lifetime in picoseconds in the different simulations. Distance cutoff for the bound state: 7 Å. X-axis: force (pN). Y-axis: time (ps).

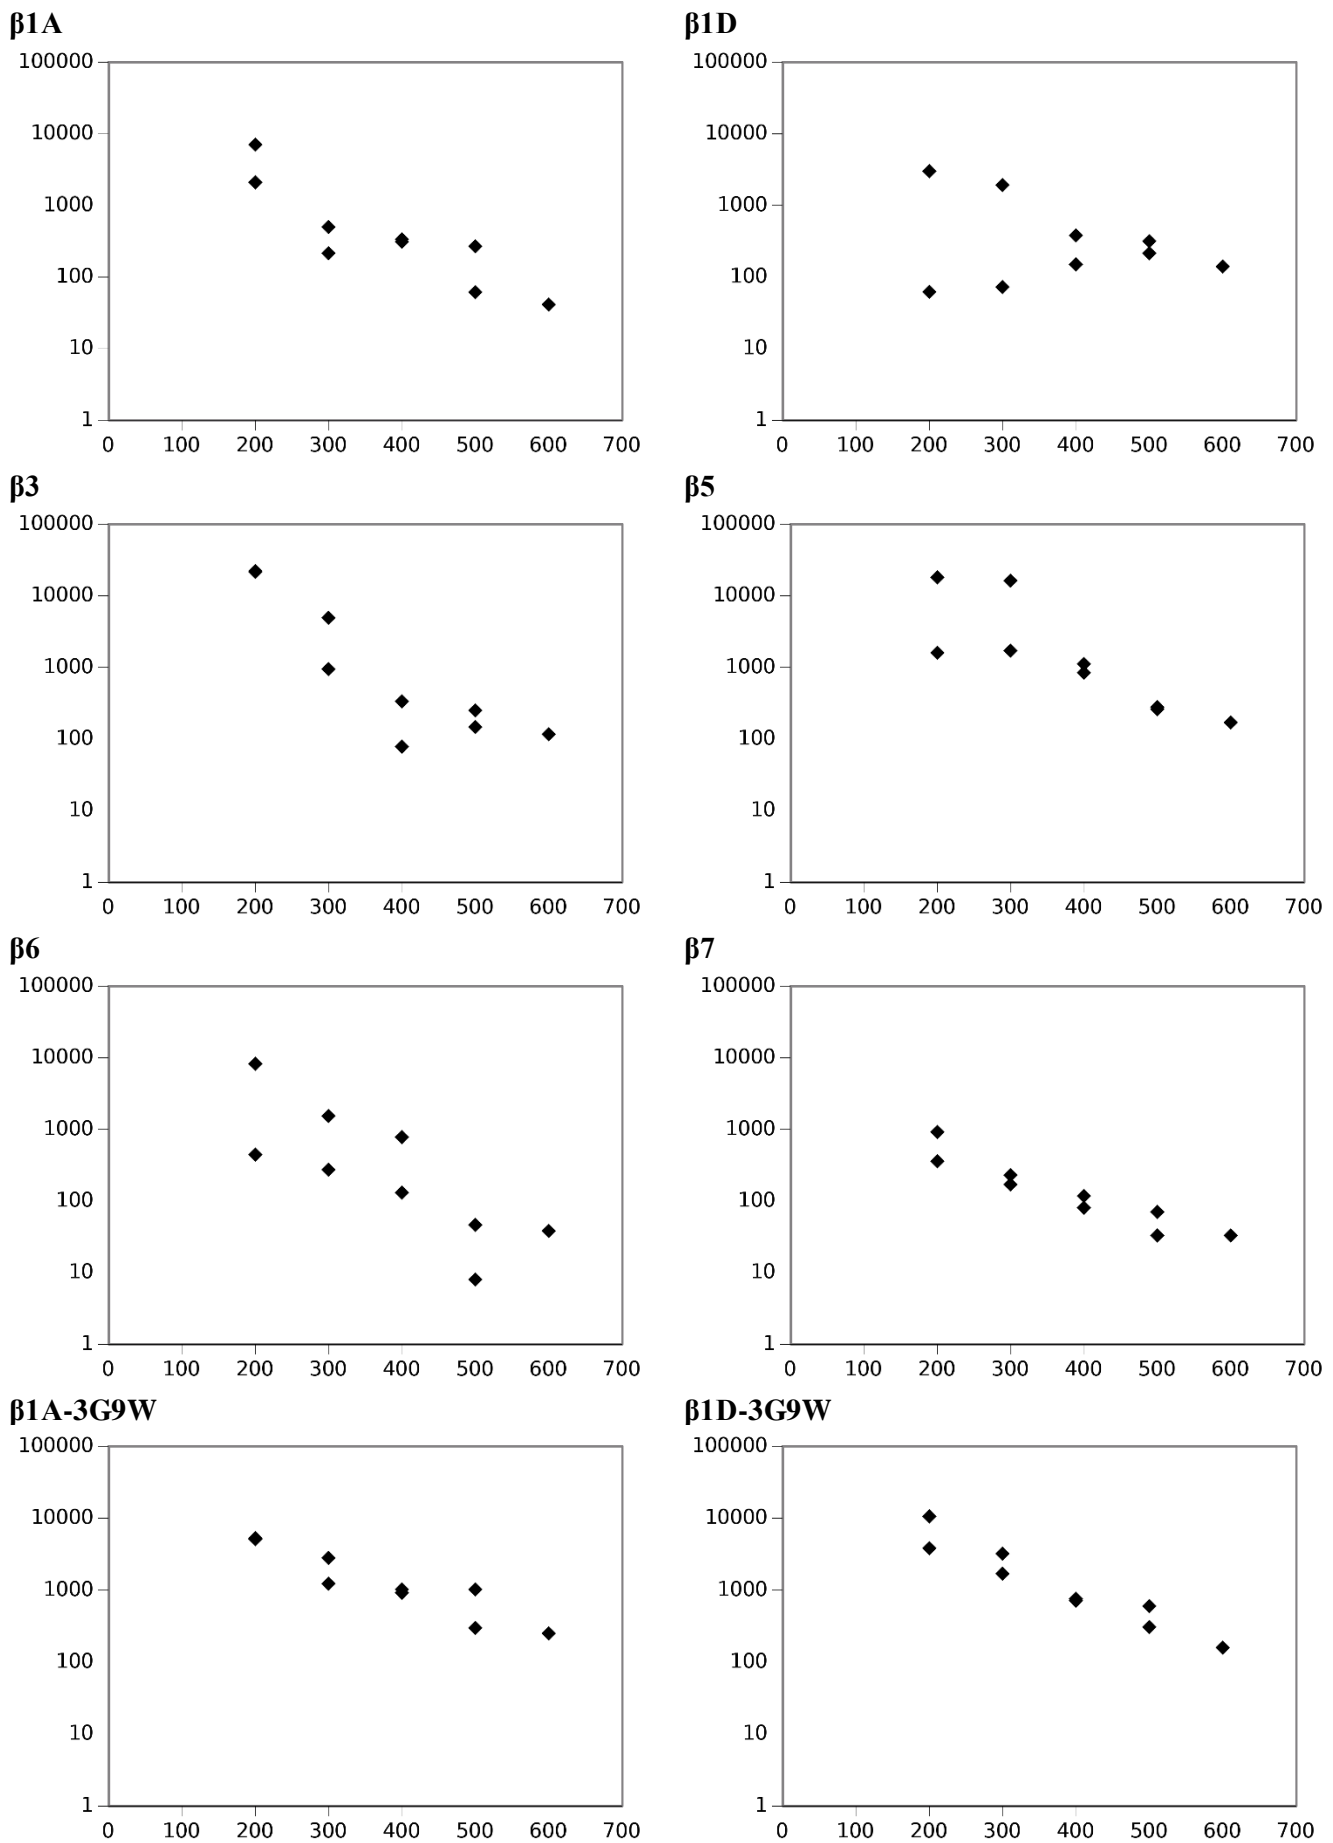

**Figure S4** Y747( $\beta$ 3) side chain center of mass distance from N355(tal) backbone O. Bound state lifetime in picoseconds in the different simulations. Distance cutoff for the bound state: 7 Å. X-axis: force (pN). Y-axis: time (ps).

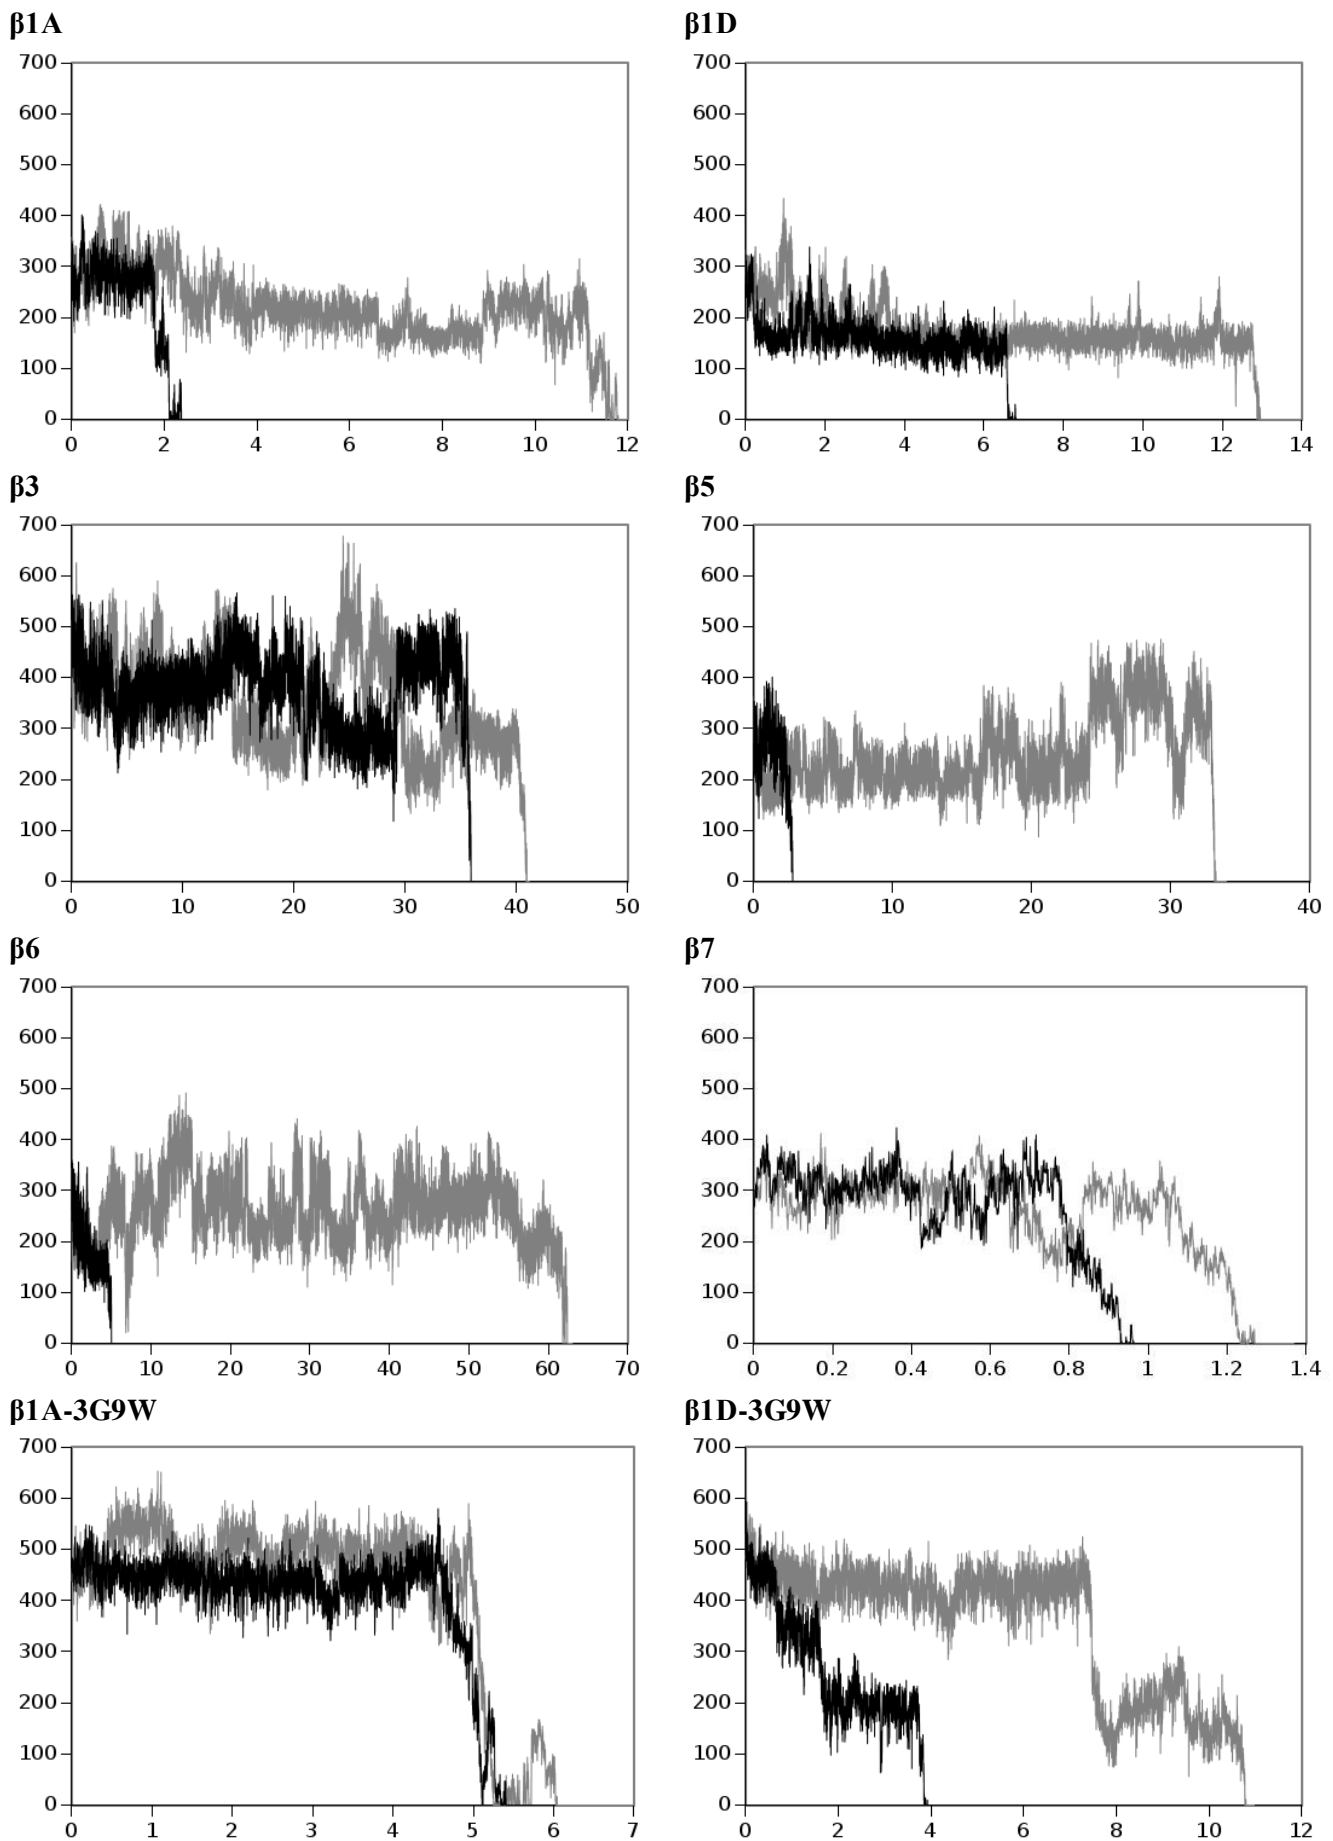

**Figure S5** Buried area of hydrophobic residues in the talin-integrin interface. The buried area was calculated for every picosecond in two 200 pN simulations, using the ‘sasa’ function in VMD. The hydrophobic residues were defined as Ala, Ile, Leu, Met, Phe, Pro, Trp, and Val. Areas from two simulations are shown in black and gray. X-axis: time (ns). Y-axis: buried area of hydrophobic residues ( $\text{\AA}^2$ ).

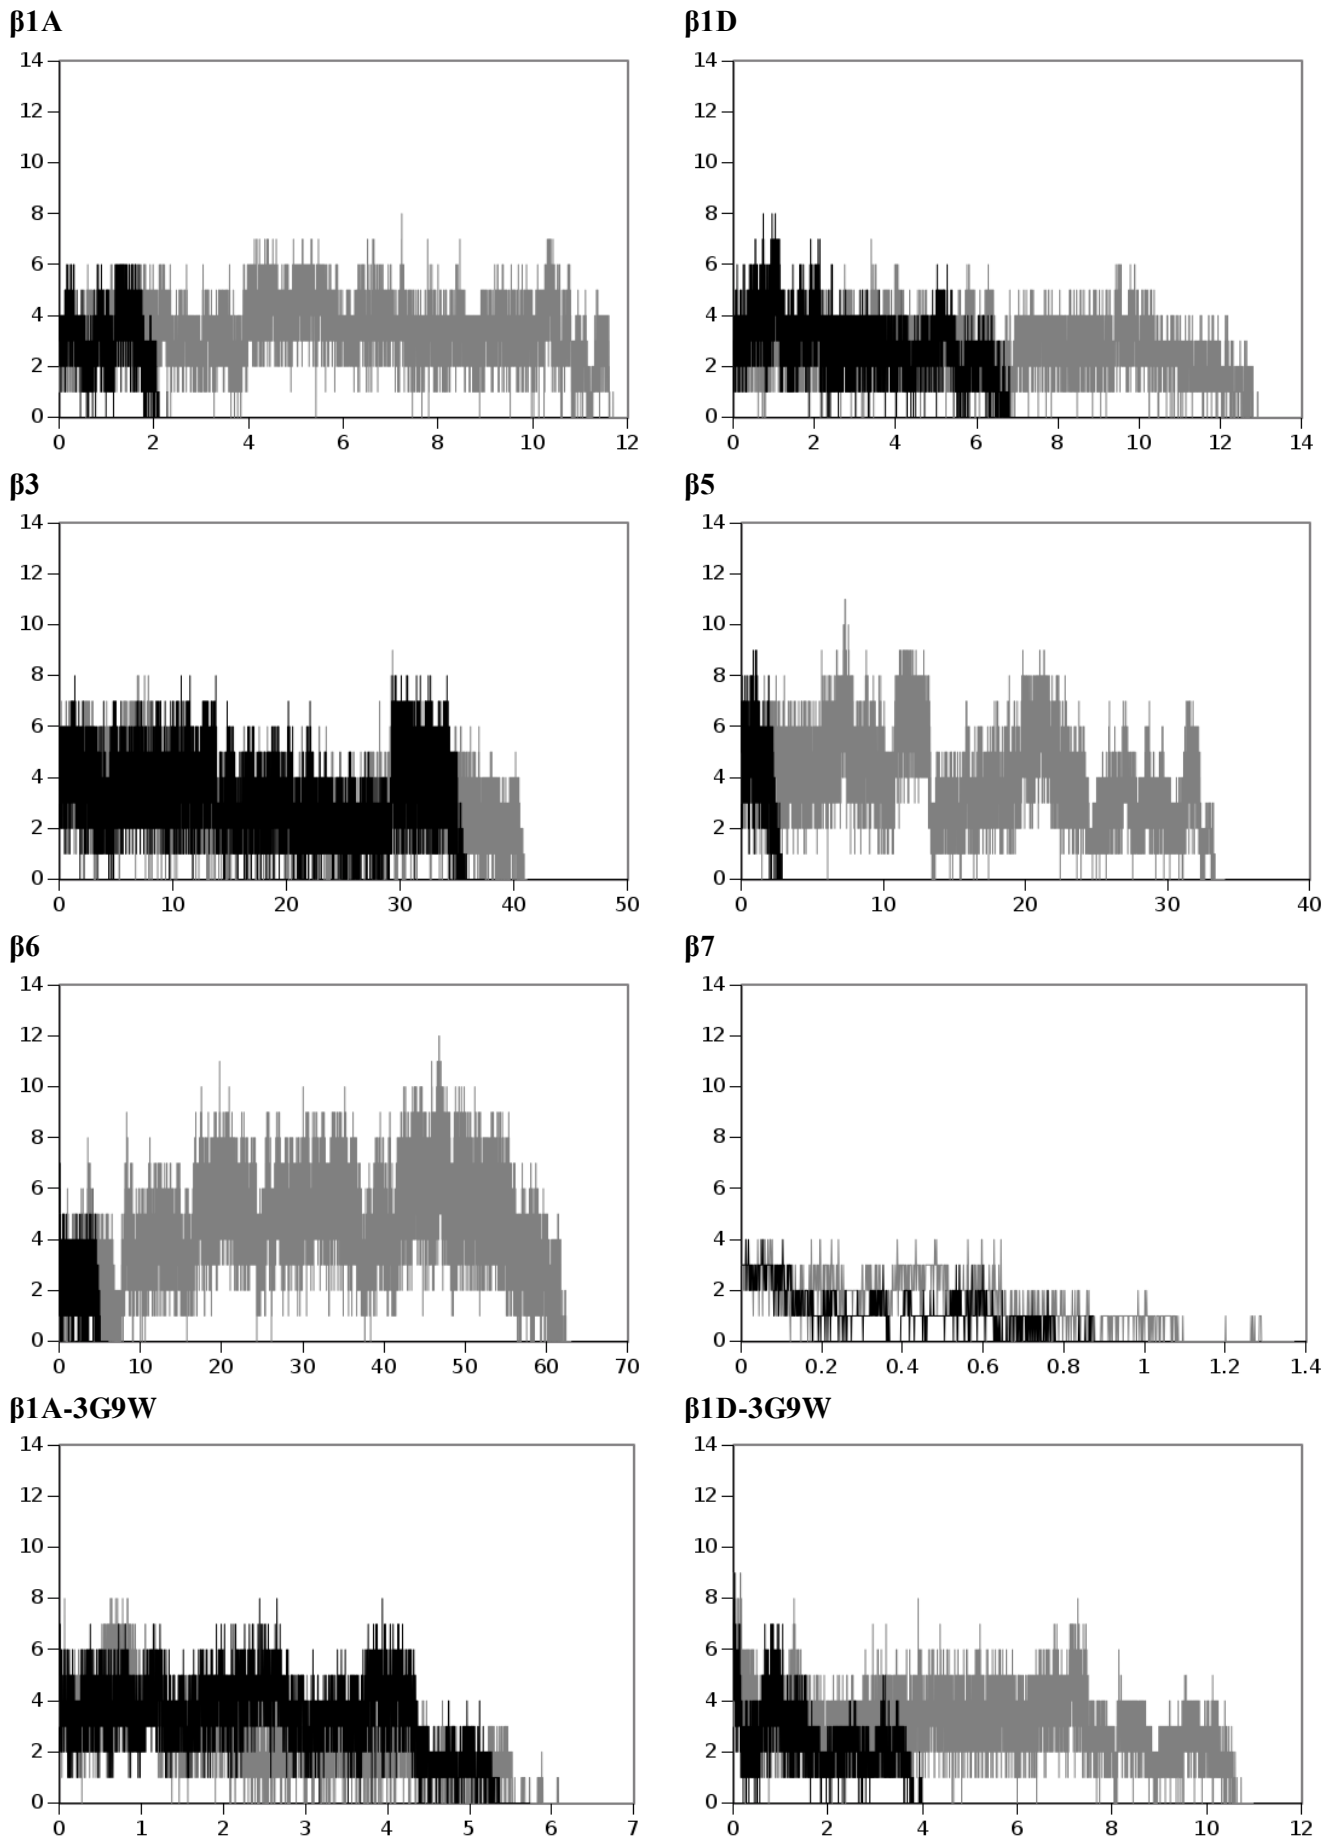

**Figure S6** Number of hydrogen bonds in the talin-integrin interface. The hydrogen bonds were calculated for every picosecond in two 200 pN simulations for each complex using the Hydrogen Bonds tool in VMD, with cutoff distance 3.51 Å and cutoff angle 30.1°. The numbers of hydrogen bonds from two simulations are shown in black and gray. X-axis: time (ns). Y-axis: number of hydrogen bonds.
